# Supplementary material
Source: HighWire-hosted journal article supplement (https://gh.bmj.com/content/4/6/e001801)
Supplement: inline-supplementary-material-3 [file inline-supplementary-material-3.pdf]

| Characteristic                                       | Development dataset (n=1015) |                |                           | Validation dataset (n=426) |                 |                           |
|------------------------------------------------------|------------------------------|----------------|---------------------------|----------------------------|-----------------|---------------------------|
|                                                      | Missing Value, n (%)         | Stunting n (%) | Values*                   | Missing Value, n (%)       | Stunting, n (%) | Values*                   |
| <b>Infant at birth</b>                               |                              |                |                           |                            |                 |                           |
| <i>Demographic</i>                                   |                              |                |                           |                            |                 |                           |
| Male sex, n (%)                                      | 2 (0.2%)                     | 171 (99.4%)    | 541 (53.4%)               | 3 (0.7%)                   | 70 (100%)       | 237 (56.0%)               |
| <i>Anthropometric</i>                                |                              |                |                           |                            |                 |                           |
| Weight (grams)                                       | 1 (0.1%)                     | 171 (99.4%)    | 3163 [394] (1300-4600)    | 0 (0%)                     | 70 (100%)       | 3106 [464] (900-4400)     |
| Gestational age (weeks)                              | 43 (4.2%)                    | 165 (95.9%)    | 39.1 [1.9] (28.4-45.9)    | 0 (0%)                     | 70 (100%)       | 38.6 [3.2] (23.4-50.1)    |
| <b>Infant at 6/8 weeks post-birth</b>                |                              |                |                           |                            |                 |                           |
| <i>Anthropometric</i>                                |                              |                |                           |                            |                 |                           |
| Length (cm)                                          | 16 (1.6%)                    | 168 (97.7%)    | 56.4 [3.1] (45.0-71.0)    | 3 (0.7%)                   | 70 (100%)       | 57.0 [2.6] (46.3-65.0)    |
| Length for age z-score                               | 16 (1.6%)                    | 168 (97.7%)    | -0.07 [1.50] (-7.14-6.77) | 3 (0.7%)                   | 70 (100%)       | -0.28 [1.14] (-7.12-3.00) |
| Stunting                                             | 16 (1.6%)                    | 168 (97.7%)    | 83 (8.3%)                 | 3 (0.7%)                   | 70 (100%)       | 18 (4.3%)                 |
| <b>Infant at 6 months post-birth</b>                 |                              |                |                           |                            |                 |                           |
| <i>Anthropometric</i>                                |                              |                |                           |                            |                 |                           |
| Weight (grams)                                       | 54 (5.3%)                    | 161 (93.6%)    | 7723 [987] (5000-13900)   | 14 (3.3%)                  | 67 (95.7%)      | 7859 [956] (5000-11500)   |
| Length (cm)                                          | 56 (5.5%)                    | 161 (93.6%)    | 66.0 [2.3] (59.5-74.2)    | 14 (3.3%)                  | 67 (95.7%)      | 67.1 [2.4] (54.9-74.5)    |
| Length for age z-score                               | 56 (5.5%)                    | 161 (93.6%)    | -0.57 [0.93] (-4.22-3.01) | 17 (4.0%)                  | 67 (95.7%)      | -0.31 [1.03] (-5.33-2.92) |
| Stunting, n (%)                                      | 56 (5.5%)                    | 161 (93.6%)    | 56 (5.8%)                 | 17 (4.0%)                  | 67 (95.7%)      | 20 (4.9%)                 |
| <i>Infections</i>                                    |                              |                |                           |                            |                 |                           |
| Fever last 2 weeks                                   | 54 (5.3%)                    | 161 (93.6%)    | 242 (25.2%)               | 14 (3.3%)                  | 67 (95.7%)      | 132 (32.0%)               |
| <i>Biochemical</i>                                   |                              |                |                           |                            |                 |                           |
| Haemoglobin (g/dL)                                   | 75 (7.4%)                    | 159 (92.4%)    | 11.0 [1.1] (6.5-15.5)     | 74 (17.4%)                 | 58 (82.9%)      | 10.2 [1.4] (5.0-14.0)     |
| <b>Maternal at 12 weeks of pregnancy (enrolment)</b> |                              |                |                           |                            |                 |                           |
| <i>Demographic</i>                                   |                              |                |                           |                            |                 |                           |
| Age (years)                                          | 0 (0%)                       | 172 (100%)     | 25.7 [4.9] (16-45)        | 0 (0%)                     | 70 (100%)       | 26.1 [4.9] (16-41)        |

| Characteristic                                                          | Development dataset (n=1015) |                |                           | Validation dataset (n=426) |                 |                           |
|-------------------------------------------------------------------------|------------------------------|----------------|---------------------------|----------------------------|-----------------|---------------------------|
|                                                                         | Missing Value, n (%)         | Stunting n (%) | Values*                   | Missing Value, n (%)       | Stunting, n (%) | Values*                   |
| Weight (kg)                                                             | 0 (0%)                       | 172 (100%)     | 47.0 [5.4] (33.7-81.4)    | 0 (0%)                     | 70 (100%)       | 47.8 [5.4] (33.2-66.4)    |
| Height (cm)                                                             | 1 (0.1%)                     | 172 (100%)     | 153.8 [4.7] (138.0-167.7) | 0 (0%)                     | 70 (100%)       | 153.5 [4.6] (139.0-168.4) |
| BMI (kg/m <sup>2</sup> )                                                | 1 (0.1%)                     | 172 (100%)     | 19.9 [2.0] (14.1-30.2)    | 0 (0%)                     | 70 (100%)       | 20.3 [2.1] (15.2-26.5)    |
| MUAC (cm)                                                               | 1 (0.1%)                     | 172 (100%)     | 23.8 [2.0] (15.8-33.8)    | 0 (0%)                     | 70 (100%)       | 24.3 [2.2] (18.3-34.0)    |
| Highest education                                                       | 0 (0%)                       | 172 (100%)     |                           | 1 (0.2%)                   | 69 (98.6%)      |                           |
| Primary school                                                          |                              |                | 152 (15.0%)               |                            |                 | 79 (18.6%)                |
| Secondary school                                                        |                              |                | 683 (67.3%)               |                            |                 | 275 (64.7%)               |
| University/College                                                      |                              |                | 180 (17.7%)               |                            |                 | 71 (16.7%)                |
| Employment                                                              | 0 (0%)                       | 172 (100%)     |                           | 0 (0%)                     | 70 (100%)       |                           |
| Farmer/Housewife                                                        |                              |                | 545 (53.7%)               |                            |                 | 238 (55.9%)               |
| Factory worker/Trader                                                   |                              |                | 331 (32.6%)               |                            |                 | 137 (32.2%)               |
| Government official/clerk                                               |                              |                | 129 (13.7%)               |                            |                 | 51 (12.0%)                |
| Type of supplement taken                                                | 0 (0%)                       | 172 (100%)     |                           | -                          | -               | N/A                       |
| Weekly iron                                                             |                              |                | 681 (67.1%)               |                            |                 |                           |
| Intermittent iron                                                       |                              |                | 334 (32.9%)               |                            |                 |                           |
| Multigravida                                                            | 1 (0.1%)                     | 172 (100%)     | 697 (68.7%)               | 0 (0%)                     | 70 (100%)       | 276 (64.8%)               |
| <b>Maternal at 32 weeks of pregnancy</b>                                |                              |                |                           |                            |                 |                           |
| <i>Demographic</i>                                                      |                              |                |                           |                            |                 |                           |
| Weight (kg)                                                             | 94 (9.3%)                    | 153 (89.0%)    | 55.2 [5.9] (40.5-86.7)    | 53 (12.4%)                 | 58 (82.9%)      | 54.3 [5.8] (38.7-73.9)    |
| Weekly weight gain between enrolment and third trimester weight (grams) | 94 (9.3%)                    | 153 (89.0%)    | 411 [126] (26-919)        | 54 (12.7%)                 | 58 (82.9%)      | 401 [140] (61-1006)       |
| <i>Biochemical</i>                                                      |                              |                |                           |                            |                 |                           |
| Haemoglobin (g/dL)                                                      | 107 (10.5%)                  | 151 (87.8%)    | 12.4 [1.2] (7.2-16.4)     | 74 (17.4%)                 | 55 (78.6%)      | 12.0 [1.4] (8.0-16.8)     |
| Ferritin (ug/L)                                                         | 111 (10.9%)                  | 150 (87.2%)    | 28 {17-42} (4-216)        | 89 (20.9%)                 | 54 (77.1%)      | 11 {7-17} (3.7-108.5)     |
| <b>Maternal at 6 months post-birth</b>                                  |                              |                |                           |                            |                 |                           |
| <i>Demographic</i>                                                      |                              |                |                           |                            |                 |                           |

| Characteristic                          | Development dataset (n=1015) |                |                        | Validation dataset (n=426) |                 |                        |
|-----------------------------------------|------------------------------|----------------|------------------------|----------------------------|-----------------|------------------------|
|                                         | Missing Value, n (%)         | Stunting n (%) | Values*                | Missing Value, n (%)       | Stunting, n (%) | Values*                |
| Weight (kg)                             | 59 (5.8%)                    | 161 (93.6%)    | 48.8 [6.1] (33.5-86.3) | 14 (3.3%)                  | 67 (95.7%)      | 48.4 [5.7] (36.0-66.4) |
| BMI (kg/m <sup>2</sup> )                | 60 (5.9%)                    | 161 (93.6%)    | 20.6 [2.3] (15.2-32.0) | 14 (3.3%)                  | 67 (95.7%)      | 20.5 [2.2] (15.3-28.5) |
| <b>Paternal at 12 months post-birth</b> |                              |                |                        |                            |                 |                        |
| <i>Demographic</i>                      |                              |                |                        |                            |                 |                        |
| Weight (kg)                             | 54 (5.3%)                    | 159 (92.4%)    | 57.7 [7.0] (39.0-81.0) | 27 (6.3%)                  | 66 (94.3%)      | 56.8 [7.3] (34.0-87.0) |
| Height (cm)                             | 54 (5.3%)                    | 159 (92.4%)    | 165.8 [5.5] (145-182)  | 27 (6.3%)                  | 66 (94.3%)      | 165.0 [5.8] (130-184)  |
| BMI (kg/m <sup>2</sup> )                | 54 (5.3%)                    | 159 (92.4%)    | 20.9 [2.1] (14.7-28.0) | 27 (6.3%)                  | 66 (94.3%)      | 20.8 [2.3] (14.2-31.2) |
| Highest education                       | 34 (3.3%)                    | 168 (97.7%)    |                        | 11 (2.6%)                  | 65 (92.9%)      |                        |
| Primary school                          |                              |                | 98 (10.0%)             |                            |                 | 65 (15.7%)             |
| Secondary school                        |                              |                | 572 (58.3%)            |                            |                 | 291 (70.1%)            |
| University/College                      |                              |                | 311 (31.7%)            |                            |                 | 59 (14.2%)             |
| Employment                              | 18 (1.8%)                    | 168 (97.7%)    |                        | 1 (0.2%)                   | 69 (98.6%)      |                        |
| Farmer/Housewife                        |                              |                | 538 (54.0%)            |                            |                 | 188 (44.2%)            |
| Factory worker/Trader                   |                              |                | 371 (37.2%)            |                            |                 | 195 (45.9%)            |
| Government official clerk               |                              |                | 88 ( 8.8%)             |                            |                 | 42 ( 9.9%)             |
| <b>Household socio-economic status</b>  |                              |                |                        |                            |                 |                        |
| Wealth Index <sup>†</sup>               | 12 (1.2%)                    | 169 (98.3%)    |                        | 0 (0%)                     | 70 (100%)       |                        |
| Poorest                                 |                              |                | -2.9 [1.1]             |                            |                 | -2.9 [0.8]             |
| Poor                                    |                              |                | -0.8 [0.5]             |                            |                 | -1.2 [0.4]             |
| Middle                                  |                              |                | 0.3 [0.3]              |                            |                 | 0.0 [0.4]              |
| Rich                                    |                              |                | 1.4 [0.2]              |                            |                 | 1.4 [0.4]              |
| Richest                                 |                              |                | 2.0 [0.2]              |                            |                 | 2.7 [0.3]              |
